# Supplementary material for: Cyclodepsipeptides: Isolation from Endophytic Fungi of Sarcophyton ehrenbergi and Verification of Their Larvicidal Activity via In-Vitro and In-Silico Studies
Source: MDPI journal article supplement (doi:10.3390/md20050331), 2022-05-18
Supplement: s1 [file s1]

## Supplementary file

Article

# Cyclodepsipeptides: Isolation from Endophytic Fungi of *Sarcophyton ehrenbergi* and Verification of Their Larvicidal Activity via In-Vitro and In-Silico Studies

**Table S1.** <sup>1</sup>H-NMR, and ATP spectral data of compound 1.

| Position      | δ <sub>c</sub> (ppm) | δ <sub>H</sub> (ppm),<br>multiplicity and J<br>(Hz) | *Ref. δ <sub>c</sub><br>(ppm) | *Ref. δ <sub>H</sub> (ppm) | Position                            | δ <sub>c</sub> (ppm) | δ <sub>H</sub> (ppm),<br>multiplicity and J<br>(Hz)    | *Ref. δ <sub>c</sub><br>(ppm) | *Ref. δ <sub>H</sub><br>(ppm) |
|---------------|----------------------|-----------------------------------------------------|-------------------------------|----------------------------|-------------------------------------|----------------------|--------------------------------------------------------|-------------------------------|-------------------------------|
| Phenylalanine |                      |                                                     |                               |                            | Valine                              |                      |                                                        |                               |                               |
| 1             | 172.66               | --                                                  | 173.6                         |                            | 1                                   | 171.79               | --                                                     | 173.4                         |                               |
| 2             | 53.25                | 4.83 (m)                                            | 55.3                          | 4.79, m                    | 2                                   | 57.93                | 4.21, m                                                | 59.9                          | 4.20, m                       |
| 3             | 38.55                | 3.12 (d, J = 8.1 Hz)<br>3.09 (d, J = 8.1 Hz)        | 39.4                          | 3.18, d<br>3.03, d         | 3                                   | 31.11                | 2.18(m)                                                | 31.0                          | 2.19, m                       |
| 4             | 135.76               | --                                                  | 137.8                         |                            | 4                                   | 18.21                | 0.93 (d, J = 3.5 Hz)                                   | 19.0                          | 0.98, d                       |
| 5/9           | 129.10               | 7.16 (m)                                            | 130.3                         | 7.24, m                    | 5                                   | 19.60                | 0.93 (d, J = 3.5 Hz)                                   | 19.7                          | 0.97, d                       |
| 6/8           | 128.52               | 7.28 (m)                                            | 129.6                         | 7.28, m                    | Glycine                             |                      |                                                        |                               |                               |
| 7             | 127.07               | 7.21 (m)                                            | 128.0                         | 7.21, m                    | 1                                   | 171.9                |                                                        | 171.9                         |                               |
| Alanine       |                      |                                                     |                               |                            | 2                                   | 43.14                | 3.44 (dd, J = 17.2,<br>4.1 Hz)<br>4.43 (d, J = 8.0 Hz) | 44.0                          | 4.24,d<br>3.53, d             |
| 1             | 172.70               | --                                                  | 174.1                         |                            | Hydroxy methyl decanoic acid (HMDA) |                      |                                                        |                               |                               |
| 2             | 49.53                | 4.24 (m)                                            | 50.3                          | 4.29, q                    | 1                                   | 172.81               | --                                                     | 174.5                         |                               |
| 3             | 17.50                | 1.29 (d, J = 7.3 Hz)                                | 17.6                          | 1.27, d                    | 2                                   | 40.98                | 2.40 (m)                                               | 40.9                          | 2.42, m                       |
| Leucine       |                      |                                                     |                               |                            | 3                                   | 78.14                | 4.64 (m)                                               | 78.6                          | 4.77, m                       |
| 1             | 173.28               | --                                                  | 175.1                         |                            | 4                                   | 37.92                | 1.58 (m)                                               | 39.0                          | 1.54, m                       |
| 2             | 54.00                | 4.16 (m)                                            | 54.7                          | 4.19, m                    | 5                                   | 32.12                | 0.91(m)<br>1.21 (m)                                    | 33.6                          | 1.22.m<br>0.95, m             |
| 3             | 39.15                | 1.58 (m)                                            | 40.3                          | 1.58, m                    | 6                                   | 29.24                | 1.21 (m)                                               | 30.6                          | 1.30, m                       |
| 4             | 24.66                | 1.68 (m)                                            | 26.0                          | 1.68, m                    | 7                                   | 29.06                | 1.21 (m)                                               | 28.2                          | 1.29, m                       |

|   |       |                        |      |         |    |       |                        |       |         |
|---|-------|------------------------|------|---------|----|-------|------------------------|-------|---------|
| 5 | 22.43 | 0.95 (d, $J = 2.5$ Hz) | 23.1 | 1.00, d | 8  | 33.20 | 1.28 (m)               | 33.0  | 1.26, m |
| 6 | 22.01 | 0.91 (d, $J = 2.2$ Hz) | 22.3 | 0.95, d | 9  | 22.69 | 1.22 (m)               | 23.7  | 1.31, m |
|   |       |                        |      |         | 10 | 13.92 | 0.85 (t)               | 14.42 | 0.91, t |
|   |       |                        |      |         | 11 | 13.52 | 0.78 (d, $J = 6.7$ Hz) | 14.41 | 0.83, d |

\* These reference data are according to reported data by Yu et al. [29].

**Table S2.**  $^1\text{H}$ -NMR and ATP spectral data of compound 2.

| Position      | $\delta_{\text{C}}$ (ppm) | $\delta_{\text{H}}$ (ppm), multiplicity and J (Hz)             | *Ref. $\delta_{\text{C}}$ (ppm) | *Ref. $\delta_{\text{H}}$ (ppm) | Position                            | $\delta_{\text{C}}$ (ppm) | $\delta_{\text{H}}$ (ppm), multiplicity and J (Hz)      | *Ref. $\delta_{\text{C}}$ (ppm) | *Ref. $\delta_{\text{H}}$ (ppm) |
|---------------|---------------------------|----------------------------------------------------------------|---------------------------------|---------------------------------|-------------------------------------|---------------------------|---------------------------------------------------------|---------------------------------|---------------------------------|
| Phenylalanine |                           |                                                                |                                 |                                 | Valine                              |                           |                                                         |                                 |                                 |
| 1             | 172.29                    | --                                                             | 173.6                           | --                              | 1                                   | 171.81                    | --                                                      | 173.4                           |                                 |
| 2             | 53.49                     | 4.72 – 4.64 (m)                                                | 55.3                            | 4.79, m                         | 2                                   | 58.05                     | 4.21 (t)                                                | 59.9                            | 4.20, m                         |
| 3             | 40.93                     | 2.98 (dd, $J = 13.5, 7.5$ Hz)<br>3.12 (dd, $J = 13.5, 8.5$ Hz) | 39.4                            | 3.18, dd<br>3.03, dd            | 3                                   | 28.25                     | 2.27 (m)                                                | 31.0                            | 2.18, m                         |
| 4             | 135.74                    | --                                                             | 137.8                           | --                              | 4                                   | 18.39                     | 0.97 (d, $J = 2.3$ Hz)                                  | 19.0                            | 0.98, d                         |
| 5/9           | 129.13                    | 7.17 (m)                                                       | 130.3                           | 7.24, m                         | 5                                   | 19.65                     | 0.97 (d, $J = 2.3$ Hz)                                  | 19.7                            | 0.97, d                         |
| 6/8           | 128.55                    | 7.26 (m)                                                       | 129.6                           | 7.28, m                         | Glycine                             |                           |                                                         |                                 |                                 |
| 7             | 127.09                    | 7.22 (m)                                                       | 128.0                           | 7.21, m                         |                                     | 171.1                     | --                                                      | 171.9                           |                                 |
| Alanine       |                           |                                                                |                                 |                                 | 2                                   | 43.21                     | 4.46 (d, $J = 8.0$ Hz)<br>3.47 (dd, $J = 17.2, 4.0$ Hz) | 44.0                            | 4.24, d<br>3.53, d              |
|               |                           |                                                                |                                 |                                 | Hydroxy methyl lactonic acid (HMOA) |                           |                                                         |                                 |                                 |
| 1             | 172.64                    | --                                                             | 174.1                           |                                 | 1                                   | 172.91                    | --                                                      | 174.5                           |                                 |
| 2             | 49.43                     | 4.14 (q)                                                       | 50.3                            | 4.29, q                         | 2                                   | 41.2                      | 2.41(m)                                                 | 40.9                            | 2.41, m                         |
| 3             | 17.89                     | 1.29 (d, $J = 7.3$ Hz)                                         | 17.6                            | 1.28, d                         | 3                                   | 77.98                     | 4.80 (m)                                                | 78.6                            | 4.77, m                         |
| Leucine       |                           |                                                                |                                 |                                 | 4                                   | 37.74                     | 1.50 (m)<br>1.2 (m)                                     | 39.0                            | 1.54m<br>1.22 m                 |
| 1             | 172.94                    | --                                                             | 175.1                           |                                 | 5                                   | 32.48                     | 1.19 (m)<br>0.91 (m)                                    | 33.3                            | 0.96 m<br>1.32 m                |
| 2             | 53.23                     | 4.27 (t)                                                       | 54.7                            | 4.19, m                         | 6                                   | 29.34                     | 1.10 (m)                                                | 30.5                            | 1.32 m                          |
| 3             | 39.06                     | 1.60 – 1.57 (m)                                                | 40.4                            | 1.58, m                         | 7                                   | 22.59                     | 1.24 (m)                                                | 23.8                            | 1.16 m                          |
| 4             | 24.52                     | 1.64 (m)                                                       | 26.0                            | 1.69, m                         | 8                                   | 13.67                     | 0.87 (t)                                                | 14.38                           | 0.90 t                          |
| 5             | 22.02                     | 0.97 (d, $J = 2.2$ Hz)                                         | 23.1                            | 0.99, d                         | 9                                   | 14.05                     | 0.75 (d, $J = 6.7$ Hz)                                  | 14.41                           | 0.83 d                          |
| 6             | 22.55                     | 0.95 (d, $J = 2.2$ Hz)                                         | 22.3                            | 0.95, d                         |                                     |                           |                                                         |                                 |                                 |

\* This reference data are according to reported data by Yu et al. [29].

## Reference

Yu, Z.; Lang, G.; Kajahn, I.; Schmaljohann, R.; Imhoff, J.F. Scopularides A and B, Cyclodepsipeptides from a Marine Sponge-Derived Fungus, *Scopulariopsis brevicaulis*. *J. Nat. Prod.* **2008**, *71*, 1052–1054.
